# Supplementary material for: Effects of CNTs on thermal transitions, thermal diffusivity and electrical conductivity in nanocomposites: comparison between an amorphous and a semicrystalline polymer matrix
Source: Royal Society of Chemistry journal article supplement (doi:10.1039/c8sm02478b), 2019-01-01
Supplement: c8sm02478b1.pdf [file c8sm02478b1.pdf]

## Supplementary Information

for

### Effects of CNT on Thermal Transitions, Thermal Diffusivity and Electrical Conductivity in Nanocomposites: Comparison between an Amorphous and a Semicrystalline Polymer Matrix

Panagiotis A. Klonos<sup>a,\*</sup>, Sokratis N. Tegopoulos<sup>a</sup>, Constantina S. Koutsira<sup>a</sup>,

Evagelia Kontou<sup>b</sup>, Polycarpos Pissis<sup>a</sup>, and Apostolos Kyritsis<sup>a</sup>

<sup>a</sup> *Department of Physics, National Technical University of Athens, Zografou Campus, 15780, Athens, Greece*

<sup>b</sup> *Mechanics Department, National Technical University of Athens, Zografou Campus, 15780, Athens, Greece*

\* *Corresponding author, e-mail address: [pklonos@central.ntua.gr](mailto:pklonos@central.ntua.gr)*

## S.1. Additional DSC results for neat polyethylene (PE) under various cooling/crystallization treatments

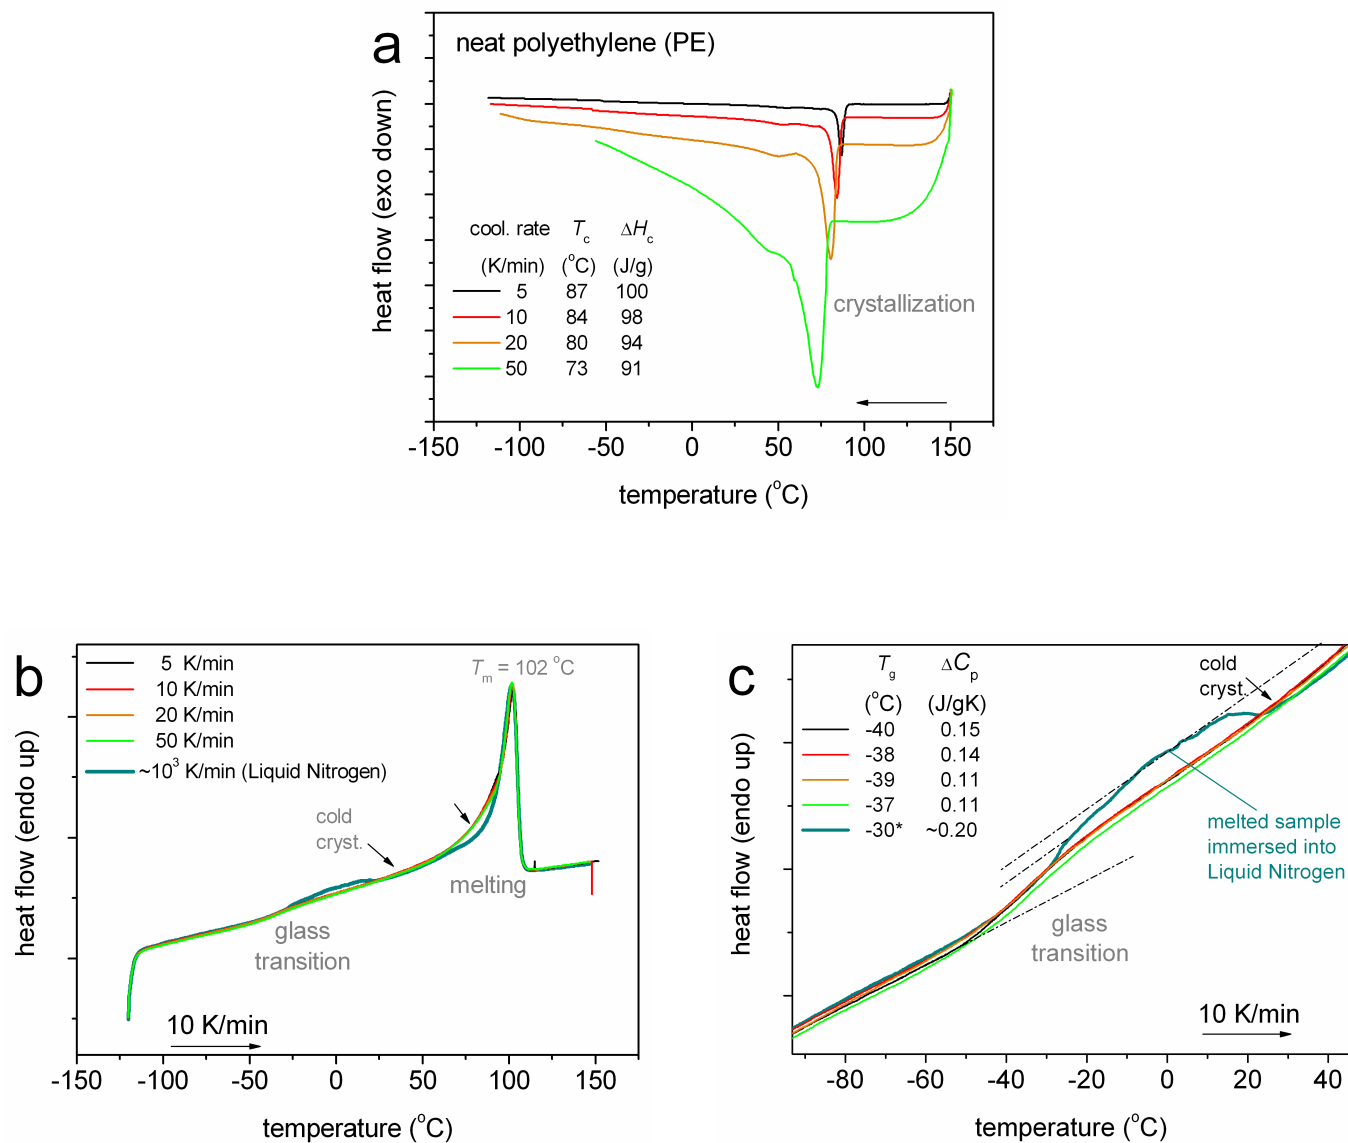

**Figure S1.** (a) DSC thermograms of neat PE during cooling at different rates 5, 10, 20, and 50 K/min. (b, c) show results during the subsequent heating at 10 K/min in (b) the overall temperature range and (c) the region of glass transition. For comparison, result for PE previously quenched by immersion in liquid nitrogen (cooling rate  $\sim 10^3$  K/min) were included in (b,c). Main values of interest are listed in (a) and (c).

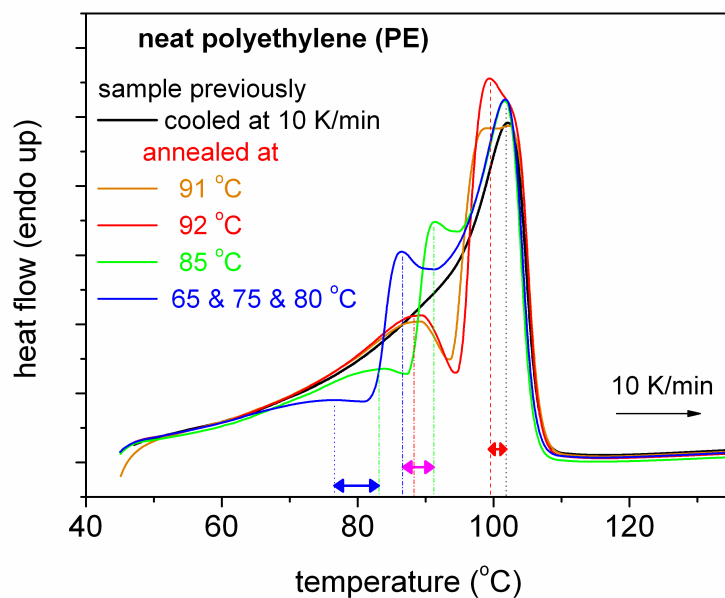

**Figure S2.** DSC results for neat PE during heating at 10 K/min in the region of crystals melting, for samples previously crystallized at the conditions described on the plot. Simple melting peak is observed for sample previously cooled continuously at 10 K/min, while quite complex melting is observed upon isothermal annealing.

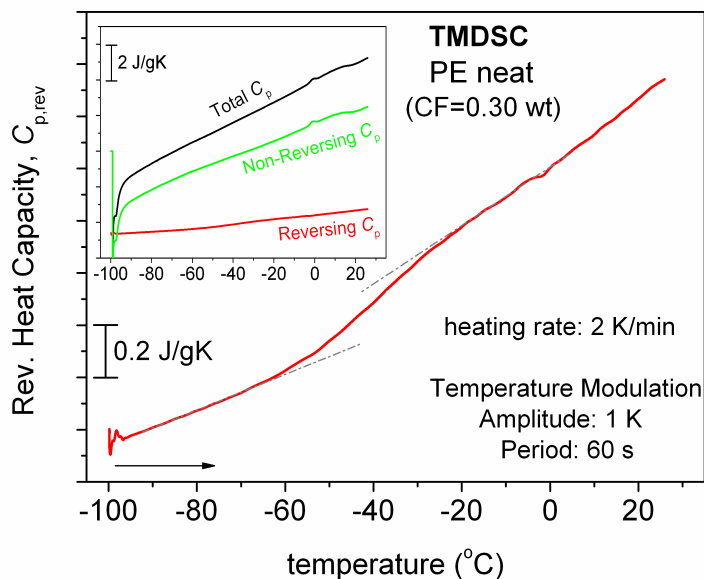

**Figure S3.** Temperature Modulation DSC (TMDSC) results for neat PE, for the measurement and crystallization condition conditions described on the plot, at the temperature range of glass transition.
